# Supplementary material for: Diffusion Weighted Imaging and T2 Mapping Detect Inflammatory Response in the Renal Tissue during Ischemia Induced Acute Kidney Injury in Different Mouse Strains and Predict Renal Outcome
Source: MDPI journal article supplement (doi:10.3390/biomedicines9081071), 2021-08-23
Supplement: s1 [file s1]

Table S1. Absolute values of T2 and ADC of the non-ischemic (control) kidney on day 1.

| Mouse strain | T2 values (ms) |          | ADC values ( $10^{-3}$ mm <sup>2</sup> /s) |         |
|--------------|----------------|----------|--------------------------------------------|---------|
|              | Cortex         | OSOM     | Cortex                                     | Medulla |
| CD1          | 46.0±2.1       | 45.9±2.0 | 2.0±0.2                                    | 2.0±0.2 |
| B6           | 47.3±3.0       | 44.7±5.1 | 1.6±0.1                                    | 1.6±0.2 |

Data is presented as mean±standard deviation. ADC=apparent diffusion coefficient.
